# Supplementary material for: Circadian Rhythm Disruption Influenced Hepatic Lipid Metabolism, Gut Microbiota and Promoted Cholesterol Gallstone Formation in Mice
Source: PubMed Central journal article supplement (PMC8567099; doi:10.3389/fendo.2021.723918), 2021-10-21

**Bmal1 in hypothalamus**

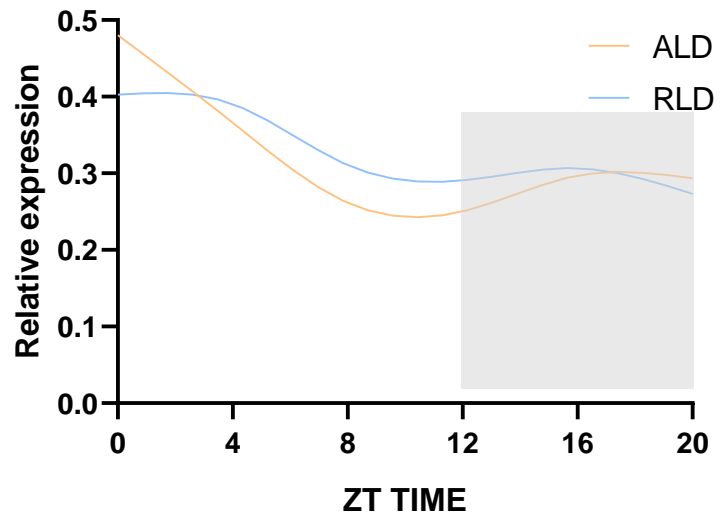

**Clock in hypothalamus**

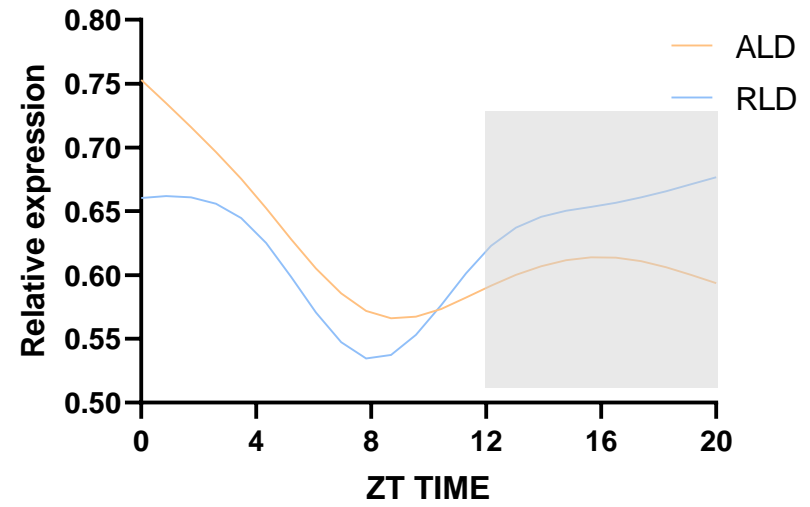

Supplement: DataSheet_2.pdf [file DataSheet_2.pdf]
