# Supplementary material for: Circadian Rhythm Disruption Influenced Hepatic Lipid Metabolism, Gut Microbiota and Promoted Cholesterol Gallstone Formation in Mice
Source: Front Endocrinol (Lausanne). 2021 Oct 21;12:723918. doi: 10.3389/fendo.2021.723918 (PMC8567099; doi:10.3389/fendo.2021.723918)
Supplement: Supplementary file 3 [file Table_1.xlsx]

## Sheet: Sheet1
m Clock-L	CCAGTCAGTTGGTCCATCATT
m Clock-R	TGGCTCCTAACTGAGCTGAAA
M Per1-L	GCTTCGTGGACTTGACACCT
M Per1-R	TGCTTTAGATCGGCAGTGGT
M Per2-L	ATCGTGAAGAACGCGGATA
M Per2-R	CAGGATCTTCCCAGAAACCA
M Cry1-L	ATCGTGCGCATTTCACATAC
M Cry1-R	TCCGCCATTGAGTTCTATGAT
M Cry2-L	GCAGAGCCTGGTTCAAGC
M Cry2-R	GCCACTGGATAGTGCTCTGG
HMGCR-L	CTTGTGGAATGCCTTGTGATTG
HMGCR-R	AGCCGAAGCAGCACATGAT
Cyp2c70-L	TGGCTTTCTCAGCAGGAAGAA
Cyp2c70-R	AACTGGCTTGGTGTCGATGT
Gapdh-L	TGTGTCCGTCGTGGATCTGA
Gapdh-R	CCTGCTTCACCACCTTCTTGAT
Abcg5-L	AATGCTGTGAATCTGTTTCCCA
Abcg5-R	CCACTTATGATACAGGCCATCCT
Abcg8-L	TGCCCACCTTCCACATGTC
Abcg8-R	ATGAAGCCGGCAGTAAGGTAGA
Cyp7a1-L	AGCAACTAAACAACCTGCCAGTACTA
Cyp7a1-R	GTCCGGATATTCAAGGATGCA
